# Supplementary material for: The In Silico Sugarcane Genome-Encoded MicroRNA and Target Network Prediction for Targeting the SCMV
Source: Preprints.org preprint supplement (doi:10.20944/preprints202305.1521.v2), 2023-06-08
Supplement: Supplementary file 1 [file Table S1.xlsx]

## Sheet: Sheet1
miRNA No.	miRNA ID	Accession ID	Mature MicroRNAs
156	>sof-miR156	MIMAT0001656	UGACAGAAGAGAGUGAGCAC
159	>sof-miR159a	MIMAT0001658	UUUGGAUUGAAGGGAGCUCUG
159	>sof-miR159b	MIMAT0001659	UUUGGAUUGAAGGGAGCUCUG
159	>sof-miR159c	MIMAT0001662	CUUGGAUUGAAGGGAGCUCCU
159	>sof-miR159d	MIMAT0001660	UUUGGAUUGAAGGGAGCUCUG
159	>sof-miR159e	MIMAT0001661	UUUGGAUUGAAAGGAGCUCUU
167	>sof-miR167a	MIMAT0001663	UGAAGCUGCCAGCAUGAUCUG
167	>sof-miR167b	MIMAT0001664	UGAAGCUGCCAGCAUGAUCUG
168	>sof-miR168a	MIMAT0001665	UCGCUUGGUGCAGAUCGGGAC
168	>sof-miR168b	MIMAT0001666	UCGCUUGGGCAGAUCGGGAC
396	>sof-miR396	MIMAT0001657	UUCCACAGCUUUCUUGAACUG
408	>sof-miR408a	MIMAT0001667	CUGCACUGCCUCUUCCCUGGC
408	>sof-miR408b	MIMAT0001668	CUGCACUGCCUCUUCCCUGGC
408	>sof-miR408c	MIMAT0001669	CUGCACUGCCUCUUCCCUGGC
408	>sof-miR408d	MIMAT0001670	CUGCACUGCCUCUUCCCUGGC
408	>sof-miR408e	MIMAT0001671	CUGCACUGACUCUUCCCUGGC
166	>ssp-miR166	MIMAT0030451	UCGGACCAGGCUUCAUUCCCC
169	>ssp-miR169	MIMAT0020278	UAGCCAAGGAUGACUUGCCGG
437	>ssp-miR437a	MIMAT0020280	AAAGUUAGAGAAGUUUGACUU
437	>ssp-miR437b	MIMAT0020281	AAAGUUAGACAAGUUUGACAU
437	>ssp-miR437c	MIMAT0020282	AAAGUUAGAGAAGUCUGACUU
528	>ssp-miR528	MIMAT0020288	UGGAAGGGGCAUGCAGAGGAG
827	>ssp-miR827	MIMAT0020279	UUAGAUGACCAUCAGCAAACA
444	>ssp-miR444a	MIMAT0020283	UGCAGUUGUUGCCUCAAGCUU
444	>ssp-miR444b	MIMAT0020285	UGCAGUUGUUGCCUCAAGCUU
444	>ssp-miR444c-3p	MIMAT0020286	UGCAGUUGUUGUCUCAAGCUU
1128	>ssp-miR1128	MIMAT0020289	UACUACUCCCUCCGUCCCAAA
1432	>ssp-miR1432	MIMAT0020290	CUCAGGAAAGAUGACACCGAC
