# Supplementary material for: The In Silico Sugarcane Genome-Encoded MicroRNA and Target Network Prediction for Targeting the SCMV
Source: Preprints.org preprint supplement (doi:10.20944/preprints202305.1521.v2), 2023-06-08
Supplement: Supplementary file 2 [file Table S2.xlsx]

## Sheet: Sheet1
miRNA Name	Position (miRanda)	Position (RNA22)	Position (TAPIR)	Position (psRNATarget)	Position (RNAhybrid)	MFE -Kcal/mol (miRanda)	Folding Energy -Kcal/mol (RNA22)	MFE Ratio TAPIR	Expectation (psRNATarget)	MFE-Kcal/mol (RNAhybrid)
sof-miR156				5909	9402				6.5	−23.90
sof-miR159a				5911	8953				5.5	−23.20
sof-miR159a (1)				3847					7
sof-miR159b				5911	8953				5.5	−23.20
sof-miR159b (1)				3847					7
sof-miR159c		3847	3847	3847	1830		−18.00	0.58	5.5	−25.40
sof-miR159c (1)		3730		5911			−17.80		6.5
sof-miR159d				5911	8953				5.5	23.2
sof-miR159d (1)				3847					7
sof-miR159e			1159	3847	8952			0.46	5.5	−21.60
sof-miR167a		9520		2427	2699		−14.10		7	−24.40
sof-miR167b		9520		2427	2699		−14.10		7	−24.40
sof-miR168a	547	846		2971	1296	−23.51	−14.20		6.5	−25.80
sof-miR168a (1)	2562	1296				−19.13	−18.70
sof-miR168a (2)	1827					−15.61
sof-miR168b	2562	846	406		1818	−20.4	−14.60	0.46		−27.00
sof-miR168b(1)	1827					−19.32
sof-miR168b(2)	547					−22.57
sof-miR396	3634	6821		7116	5016	−20.27	−14.20		6.5	−27.60
sof-miR408a	139	5538			8355	−23.27	−15.30			−27.30
sof-miR408b	139	5538			8355	−23.27	−15.30			−27.30
sof-miR408c	139	5538			8355	−23.27	−15.30			−27.30
sof-miR408d	139	5538			8355	−23.27	−15.30			−27.30
sof-miR408e		5538		6544	3633		−15.38		7	−24.80
ssp-miR166	4178				3714	−22.32				−24.90
ssp-miR169	7798				8458	−15.52				−28.00
ssp-miR437a			4869		4868			0.69		−21.20
ssp-miR437b					2416					−20.20
ssp-miR437c				2981	9395				7	−21.90
ssp-miR528	6376		122		121	−15.82		0.6		−26.50
ssp-miR827					6338					−23.20
ssp-miR444a	8501	8502		1058	1057	−18.42	−18.00		7	−29.00
ssp-miR444a(1)		5311		2367			−14.20		7
ssp-miR444a(2)				6641					7
ssp-miR444b	8501	8502		7142	1057	−18.42	−18.00		6.5	−29.00
ssp-miR444b(1)		5311		1058			−14.20		7
ssp-miR444b(2)				6641					7
ssp-miR444b(3)				2367					7
ssp-miR444(4)				3992					6.5
ssp-miR444c-3p	8501	5552	5583	9282	1057	−18.42	−18.52	0.59	7	−29.00
ssp-miR444c-3p(1)	9268	9181		1763		−19.36	−14.30		7
ssp-miR444c-3p(2)				2367					5.5
ssp-miR444c-3p(3)				5583					6
ssp-miR444c-3p(4)				3441					6.5
ssp-miR1128			4534		4533			0.66		−27.30
ssp-miR1432	7523	1315		3980	1316	−22.23	−15.40		7	−22.20
Loci	19	20	7	30	28
miRNAs	14	15	7	16	28
